# Supplementary material for: Effect of Vitamin D Supplementation on Glycemic Control in Prediabetes: A Meta-Analysis
Source: MDPI journal article supplement (doi:10.3390/nu13124464), 2021-12-14
Supplement: s1 [file s1]

A

|                    | Random sequence generation (selection bias) | Allocation concealment (selection bias) | Blinding of participants and personnel (performance bias) | Blinding of outcome assessment (detection bias) | Incomplete outcome data (attrition bias) | Selective reporting (reporting bias) | Other bias           |
|--------------------|---------------------------------------------|-----------------------------------------|-----------------------------------------------------------|-------------------------------------------------|------------------------------------------|--------------------------------------|----------------------|
| Ahmed 2020         | Low risk of bias                            | Low risk of bias                        | Low risk of bias                                          | Low risk of bias                                | Low risk of bias                         | Low risk of bias                     | Low risk of bias     |
| Ansari 2020        | High risk of bias                           | High risk of bias                       | High risk of bias                                         | High risk of bias                               | Low risk of bias                         | Low risk of bias                     | Unclear risk of bias |
| Barengolts 2015    | Low risk of bias                            | Low risk of bias                        | Low risk of bias                                          | Low risk of bias                                | Low risk of bias                         | Low risk of bias                     | Unclear risk of bias |
| Bhatt 2020         | Low risk of bias                            | Low risk of bias                        | Low risk of bias                                          | Low risk of bias                                | High risk of bias                        | Low risk of bias                     | Low risk of bias     |
| Davidson 2013      | Low risk of bias                            | Low risk of bias                        | Low risk of bias                                          | Unclear risk of bias                            | Low risk of bias                         | Low risk of bias                     | Unclear risk of bias |
| de Boer 2008       | Low risk of bias                            | Low risk of bias                        | Low risk of bias                                          | Unclear risk of bias                            | Low risk of bias                         | Low risk of bias                     | Unclear risk of bias |
| Didriksen 2015     | Low risk of bias                            | Low risk of bias                        | Low risk of bias                                          | Low risk of bias                                | High risk of bias                        | Low risk of bias                     | Unclear risk of bias |
| Dutta 2014         | Low risk of bias                            | High risk of bias                       | High risk of bias                                         | High risk of bias                               | High risk of bias                        | Low risk of bias                     | Unclear risk of bias |
| Forouhi 2016       | Low risk of bias                            | Low risk of bias                        | Low risk of bias                                          | Low risk of bias                                | Low risk of bias                         | Low risk of bias                     | Low risk of bias     |
| Harris 2012        | Low risk of bias                            | Low risk of bias                        | Unclear risk of bias                                      | Low risk of bias                                | Low risk of bias                         | Low risk of bias                     | Unclear risk of bias |
| Hoseini 2013       | Low risk of bias                            | High risk of bias                       | High risk of bias                                         | Low risk of bias                                | Low risk of bias                         | Low risk of bias                     | High risk of bias    |
| Jorde 2010         | Unclear risk of bias                        | High risk of bias                       | Low risk of bias                                          | Low risk of bias                                | High risk of bias                        | Low risk of bias                     | Unclear risk of bias |
| Jorde 2016         | Low risk of bias                            | Low risk of bias                        | Low risk of bias                                          | Low risk of bias                                | High risk of bias                        | Low risk of bias                     | Unclear risk of bias |
| Kuchay 2015        | Low risk of bias                            | High risk of bias                       | High risk of bias                                         | High risk of bias                               | High risk of bias                        | Low risk of bias                     | Unclear risk of bias |
| Lu 2019            | Unclear risk of bias                        | High risk of bias                       | High risk of bias                                         | High risk of bias                               | Low risk of bias                         | Low risk of bias                     | Unclear risk of bias |
| Mitri 2011         | Low risk of bias                            | Low risk of bias                        | Low risk of bias                                          | Low risk of bias                                | Low risk of bias                         | Low risk of bias                     | Low risk of bias     |
| Moreira-Lucas 2017 | Low risk of bias                            | Low risk of bias                        | Low risk of bias                                          | Low risk of bias                                | High risk of bias                        | Low risk of bias                     | Low risk of bias     |
| Naharci 2012       | High risk of bias                           | High risk of bias                       | High risk of bias                                         | Low risk of bias                                | Low risk of bias                         | Low risk of bias                     | High risk of bias    |
| Nimitphong 2015    | Low risk of bias                            | High risk of bias                       | High risk of bias                                         | Low risk of bias                                | Low risk of bias                         | Low risk of bias                     | Unclear risk of bias |
| Niroomand 2019     | Low risk of bias                            | Low risk of bias                        | Low risk of bias                                          | Low risk of bias                                | High risk of bias                        | Low risk of bias                     | Unclear risk of bias |
| Oosterwerff 2014   | Low risk of bias                            | Low risk of bias                        | Low risk of bias                                          | Low risk of bias                                | High risk of bias                        | Low risk of bias                     | Low risk of bias     |
| Pittas 2007        | Low risk of bias                            | Low risk of bias                        | Low risk of bias                                          | Low risk of bias                                | Low risk of bias                         | Low risk of bias                     | Low risk of bias     |
| Rajabi-Naeeni 2020 | Low risk of bias                            | Low risk of bias                        | Low risk of bias                                          | Low risk of bias                                | Low risk of bias                         | Low risk of bias                     | Unclear risk of bias |
| Sollid 2014        | Low risk of bias                            | Low risk of bias                        | Low risk of bias                                          | Low risk of bias                                | Low risk of bias                         | Low risk of bias                     | Unclear risk of bias |
| Thani 2019         | Low risk of bias                            | Low risk of bias                        | Low risk of bias                                          | Low risk of bias                                | Low risk of bias                         | Low risk of bias                     | Low risk of bias     |
| Tuomainen 2015     | Low risk of bias                            | Low risk of bias                        | Low risk of bias                                          | Low risk of bias                                | Low risk of bias                         | Low risk of bias                     | Low risk of bias     |
| Wagner 2016        | Low risk of bias                            | Low risk of bias                        | Low risk of bias                                          | Low risk of bias                                | Low risk of bias                         | Low risk of bias                     | Low risk of bias     |
| Wallace 2019       | Low risk of bias                            | Low risk of bias                        | Low risk of bias                                          | Low risk of bias                                | High risk of bias                        | Low risk of bias                     | Unclear risk of bias |
| Zarrin 2017        | Low risk of bias                            | High risk of bias                       | Low risk of bias                                          | Low risk of bias                                | Low risk of bias                         | Low risk of bias                     | Unclear risk of bias |

B

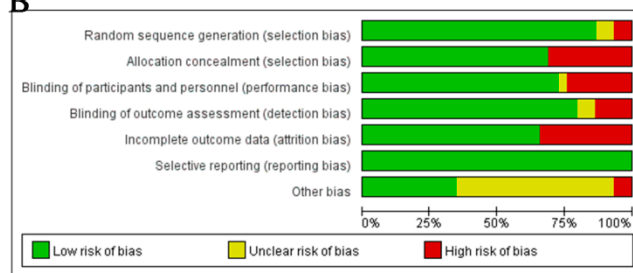

**Figure S1.** Risk of bias assessment of the included studies using the Cochrane Collaboration tool. (A) Risk of bias in included studies; (B) Risk of bias across each bias domain. Risk of bias levels: green (low), yellow (unclear), red (high).

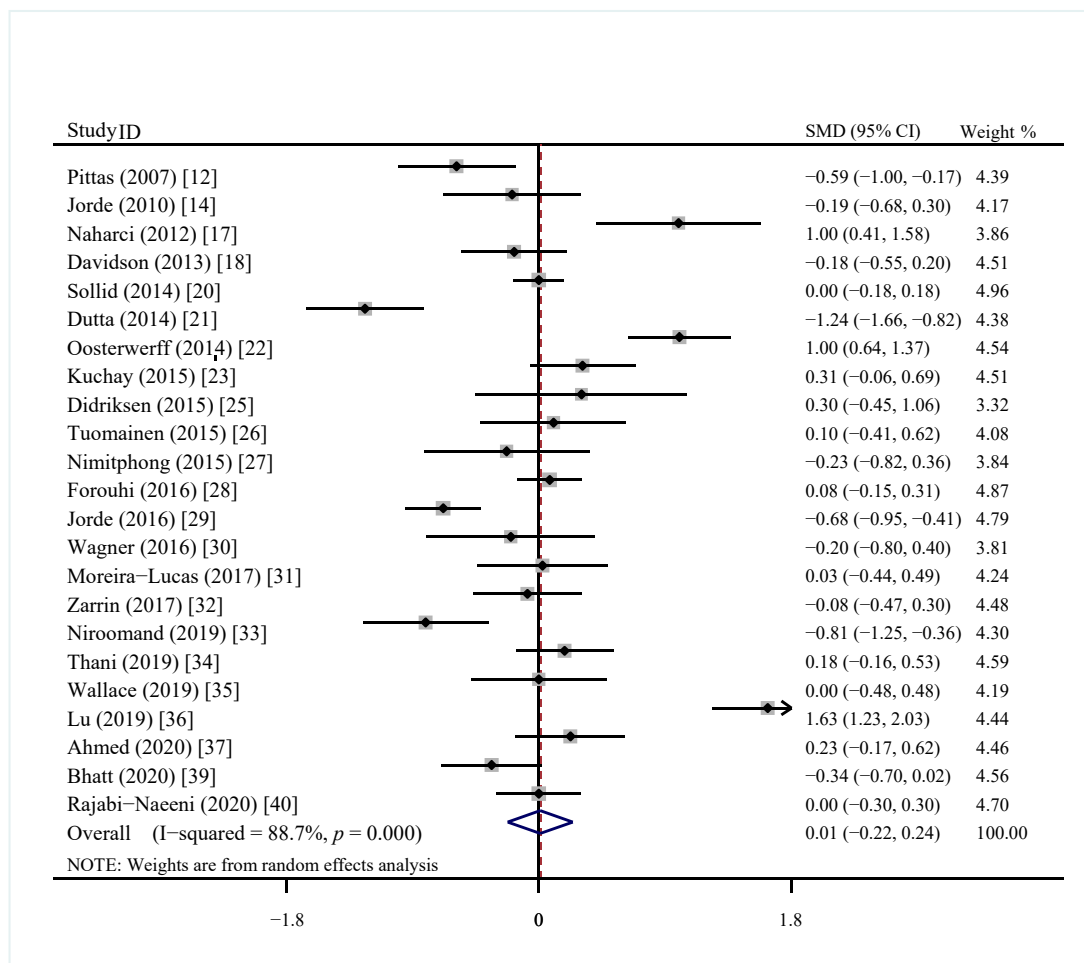

**Figure S2.** Effect of vitamin D supplementation on body mass index in prediabetes.

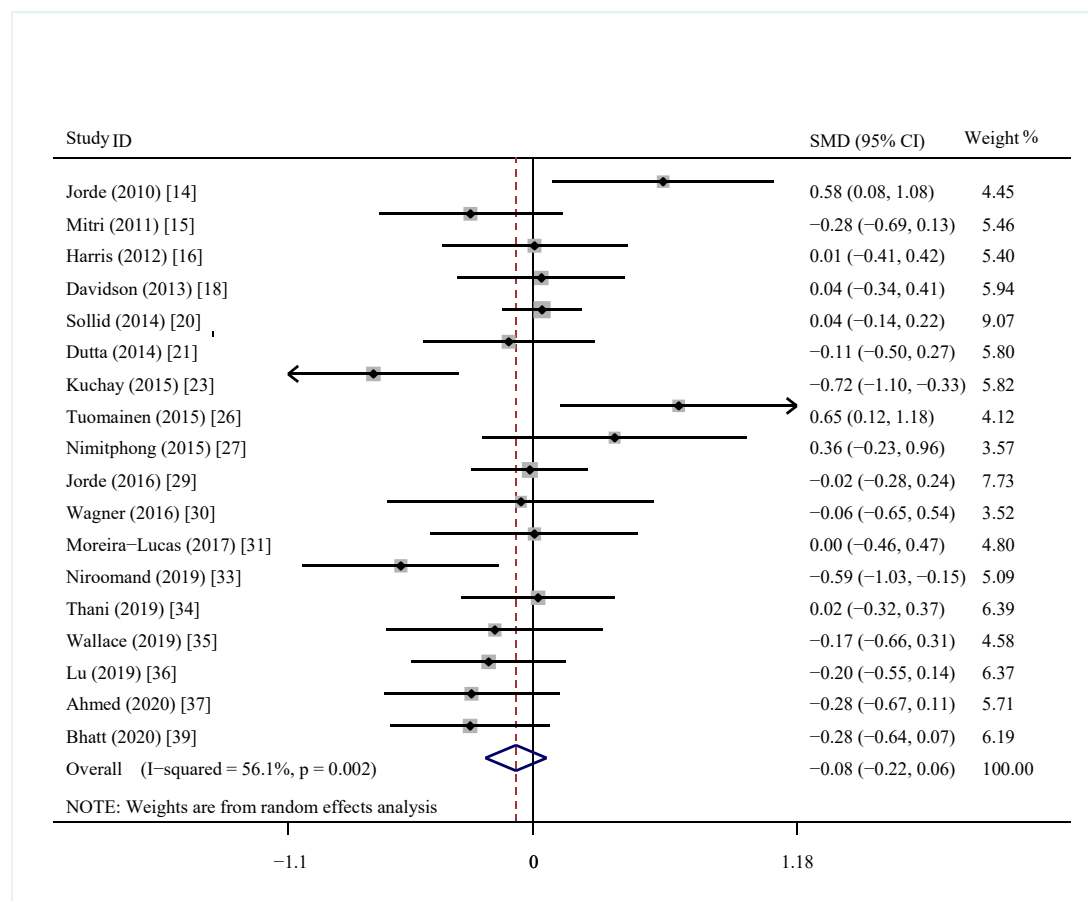

**Figure S3.** Effect of vitamin D supplementation on 2h oral glucose tolerance test plasma glucose in prediabetes.

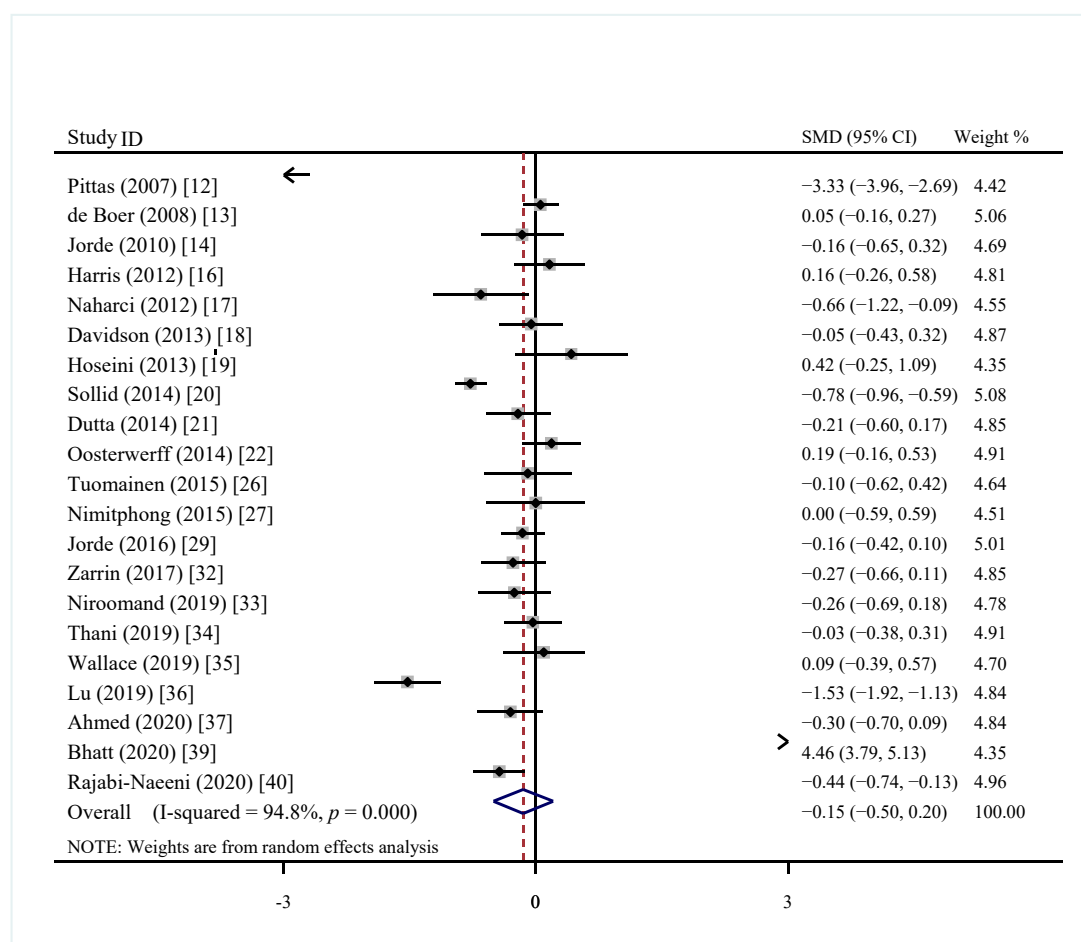

**Figure S4.** Effect of vitamin D supplementation on insulin resistance by homeostasis model assessment in prediabetes.

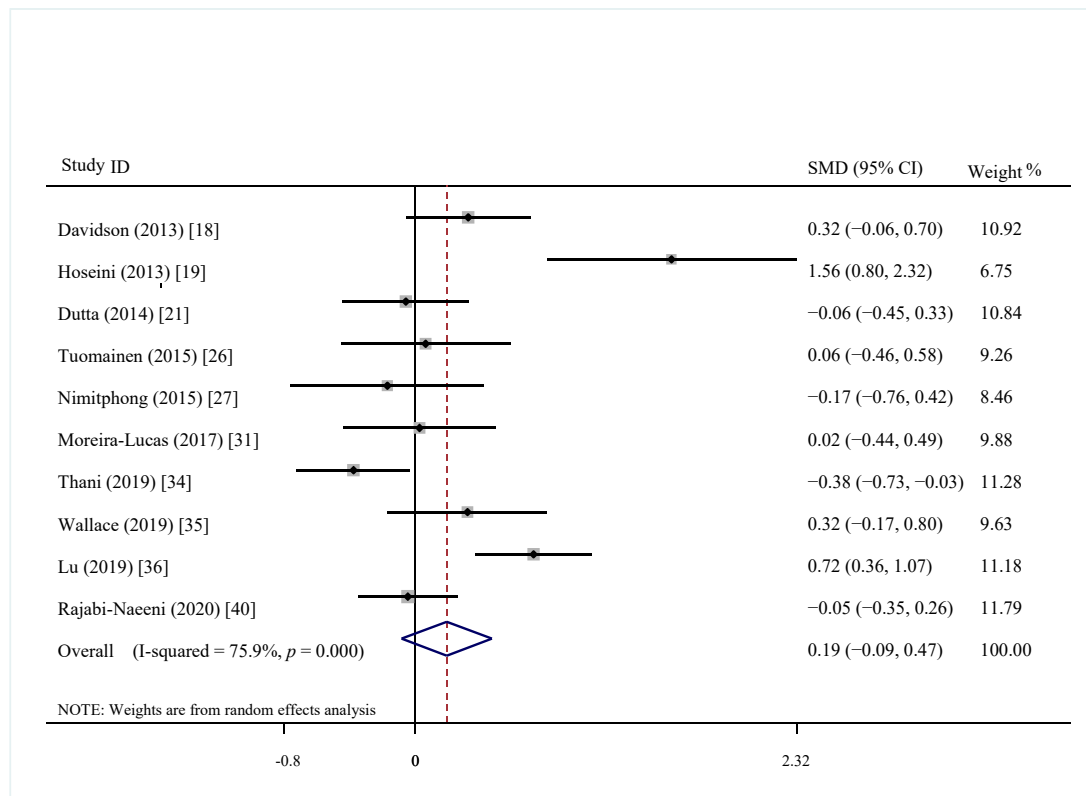

**Figure S5.** Effect of vitamin D supplementation on homeostasis model assessment of  $\beta$ -cell function in prediabetes.
